# Supplementary material for: Co-Expression Network Analysis of the Transcriptome Identified Hub Genes and Pathways Responding to Saline–Alkaline Stress in Sorghum bicolor L
Source: MDPI journal article supplement (doi:10.3390/ijms242316831), 2023-11-27
Supplement: s1 [file s1]

**Table S1.** Growth of shoots and root lengths.

|   |       | 0 h |     | 6 h |     | 12 h |     | 24 h |     |
|---|-------|-----|-----|-----|-----|------|-----|------|-----|
|   |       | CK  | EG  | CK  | EG  | CK   | EG  | CK   | EG  |
| 1 | shoot | 98  | 94  | 103 | 95  | 105  | 95  | 105  | 97  |
|   | root  | 83  | 85  | 84  | 87  | 86   | 88  | 85   | 88  |
| 2 | shoot | 103 | 104 | 104 | 111 | 108  | 111 | 110  | 112 |
|   | root  | 87  | 87  | 87  | 89  | 89   | 91  | 90   | 91  |
| 3 | shoot | 100 | 102 | 102 | 102 | 102  | 104 | 103  | 105 |
|   | root  | 86  | 83  | 87  | 84  | 88   | 85  | 88   | 84  |
| 4 | shoot | 104 | 99  | 105 | 100 | 106  | 101 | 106  | 101 |
|   | root  | 92  | 83  | 92  | 84  | 92   | 86  | 92   | 87  |
| 5 | shoot | 109 | 95  | 109 | 96  | 111  | 97  | 112  | 97  |
|   | root  | 81  | 84  | 82  | 86  | 83   | 88  | 82   | 89  |
| 6 | shoot | 103 | 97  | 104 | 98  | 105  | 98  | 105  | 99  |
|   | root  | 82  | 83  | 82  | 84  | 83   | 84  | 84   | 86  |

Table S1: In the table, CK stands for control check , EG stands for Processing Group.

**Table S2.** Comparison of significance of shoots and root growth.

|      | shoot     |           | root     |          |
|------|-----------|-----------|----------|----------|
|      | CK        | EG        | CK       | EG       |
| 0 h  | 102.8±3.8 | 98.5±3.9  | 85.2±4.1 | 84.2±1.6 |
| 6 h  | 104.5±2.4 | 100.3±5.8 | 85.7±3.8 | 85.7±2.1 |
| 12 h | 106.2±3.1 | 101.0±5.8 | 86.3±3.8 | 86.7±2.8 |
| 24 h | 106.8±3.4 | 101.8±5.8 | 86.8±3.8 | 87.5±2.4 |

Table S2: In the table, CK stands for control check , EG stands for Processing Group

**Table S3.** GO analysis was performed on the detected co-expression modules.

| Category         | Term                                                                    | Count |
|------------------|-------------------------------------------------------------------------|-------|
| GOTERM_BP_DIRECT | GO:0050896~response to stimulus                                         | 29    |
| GOTERM_BP_DIRECT | GO:0006749~glutathione metabolic process                                | 25    |
| GOTERM_BP_DIRECT | GO:0009664~plant-type cell wall organization                            | 13    |
| GOTERM_BP_DIRECT | GO:0009738~abscisic acid-activated signaling pathway                    | 13    |
| GOTERM_BP_DIRECT | GO:0019941~modification-dependent protein catabolic process             | 8     |
| GOTERM_CC_DIRECT | GO:0005886~plasma membrane                                              | 105   |
| GOTERM_CC_DIRECT | GO:0005576~extracellular region                                         | 43    |
| GOTERM_CC_DIRECT | GO:0048046~apoplast                                                     | 24    |
| GOTERM_CC_DIRECT | GO:0016020~membrane                                                     | 69    |
| GOTERM_CC_DIRECT | GO:0005634~nucleus                                                      | 202   |
| GOTERM_MF_DIRECT | GO:0004364~glutathione transferase activity                             | 25    |
| GOTERM_MF_DIRECT | GO:0043565~sequence-specific DNA binding                                | 55    |
| GOTERM_MF_DIRECT | GO:0003700~transcription factor activity, sequence-specific DNA binding | 94    |
| GOTERM_MF_DIRECT | GO:0005506~iron ion binding                                             | 53    |
| GOTERM_MF_DIRECT | GO:0004497~monooxygenase activity                                       | 38    |

Table S3: Gene ontology ( GO ) was used to perform functional enrichment analysis of up-regulated genes in the detected co-expression module. It is divided into three parts : Molecular Function ( MF ) , Biological Process ( BP ) , and Cell Component ( CC ).

**Table S4.** KEGG analysis was performed on the detected co-expression modules

| Category     | Term                                                            | Count |
|--------------|-----------------------------------------------------------------|-------|
| KEGG_PATHWAY | sbi01110:Biosynthesis of secondary metabolites                  | 124   |
| KEGG_PATHWAY | sbi01100:Metabolic pathways                                     | 186   |
| KEGG_PATHWAY | sbi00480:Glutathione metabolism                                 | 22    |
| KEGG_PATHWAY | sbi04075:Plant hormone signal transduction                      | 30    |
| KEGG_PATHWAY | sbi00592:alpha-Linolenic acid metabolism                        | 11    |
| KEGG_PATHWAY | sbi04016:MAPK signaling pathway - plant                         | 35    |
| KEGG_PATHWAY | sbi00960:Tropane, piperidine and pyridine alkaloid biosynthesis | 8     |
| KEGG_PATHWAY | sbi02010:ABC transporters                                       | 11    |
| KEGG_PATHWAY | sbi00999:Biosynthesis of various plant secondary metabolites    | 10    |
| KEGG_PATHWAY | sbi00071:Fatty acid degradation                                 | 8     |
| KEGG_PATHWAY | sbi00130:Ubiquinone and other terpenoid-quinone biosynthesis    | 8     |
| KEGG_PATHWAY | sbi00941:Flavonoid biosynthesis                                 | 8     |
| KEGG_PATHWAY | sbi00290:Valine, leucine and isoleucine biosynthesis            | 4     |
| KEGG_PATHWAY | sbi00500:Starch and sucrose metabolism                          | 41    |
| KEGG_PATHWAY | sbi00940:Phenylpropanoid biosynthesis                           | 69    |
| KEGG_PATHWAY | sbi00350:Tyrosine metabolism                                    | 6     |
| KEGG_PATHWAY | sbi00620:Pyruvate metabolism                                    | 9     |
| KEGG_PATHWAY | sbi00906:Carotenoid biosynthesis                                | 4     |
| KEGG_PATHWAY | sbi00600:Sphingolipid metabolism                                | 5     |
| KEGG_PATHWAY | sbi00410:beta-Alanine metabolism                                | 5     |

Table S4 : Kyoto Encyclopedia of Genes and Genomes ( KEGG ) was used to perform functional enrichment analysis of up-regulated genes in the detected co-expression module.

**Table S5.** Key genes screened by protein interaction network analysis.

| <b>Name</b>       | <b>Probable Encoded Protein</b>                                                                                                        |
|-------------------|----------------------------------------------------------------------------------------------------------------------------------------|
| SORBI_3006G014700 | PKS_ER domain-containing protein.                                                                                                      |
| SORBI_3005G119900 | FAD-binding PCMH-type domain-containing protein; Belongs to the oxygen-dependent FAD-linked oxidoreductase family.                     |
| SORBI_3008G113600 | Glutathione synthetase.                                                                                                                |
| SORBI_3007G213700 | Aminotran_5 domain-containing protein.                                                                                                 |
| SORBI_3006G165400 | Glutamate dehydrogenase; Belongs to the Glu/Leu/Phe/Val dehydrogenases family.                                                         |
| SORBI_3001G406800 | Asparagine synthetase [glutamine-hydrolyzing].                                                                                         |
| SORBI_3005G003200 | Asparagine synthetase [glutamine-hydrolyzing].                                                                                         |
| SORBI_3006G095700 | Glutamate decarboxylase; Belongs to the group II decarboxylase family.                                                                 |
| SORBI_3001G294400 | Protein kinase domain-containing protein; Belongs to the protein kinase superfamily.                                                   |
| SORBI_3001G009900 | Uncharacterized protein.                                                                                                               |
| SORBI_3007G153900 | Nitrate reductase; Nitrate reductase is a key enzyme involved in the first step of nitrate assimilation in plants, fungi and bacteria. |
| SORBI_3006G083000 | Protein kinase domain-containing protein; Belongs to the protein kinase superfamily.                                                   |
| SORBI_3009G172500 | Uncharacterized protein; Belongs to the class-III pyridoxal-phosphate-dependent aminotransferase family.                               |
| SORBI_3001G488200 | Uncharacterized protein; Belongs to the class-III pyridoxal-phosphate-dependent aminotransferase family.                               |
| SORBI_3002G304000 | CN hydrolase domain-containing protein.                                                                                                |
| SORBI_3006G014700 | PKS_ER domain-containing protein.                                                                                                      |

**Table S6.** DEGs involved in the plant hormone biosynthesis and the plant hormone signal transduction in shoots.

| KEGG    | GENE ID           | Description                                          | log <sub>2</sub> (fold change) |              |              |
|---------|-------------------|------------------------------------------------------|--------------------------------|--------------|--------------|
|         |                   |                                                      | T6s vs CKs                     | T12s vs CKs  | T24s vs CKs  |
| AUX1    | SORBI_3001G439000 | auxin transporter-like protein 2                     | -3.446892786                   | -2.555374354 | -1.185243466 |
| AUX/IAA | SORBI_3003G291200 | auxin-responsive protein IAA6-like                   | 2.008256866                    | 1.30104417   | 2.242942155  |
|         | SORBI_3005G098400 | auxin-responsive protein IAA27                       | -4.714654434                   | -2.743843539 | -3.44036086  |
| GH3     | SORBI_3008G015100 | probable indole-3-acetic acid-amido synthetase GH3.8 | 1.66009611                     | 1.725944624  | 1.404131982  |
|         | SORBI_3003G015000 | jasmonic acid-amido synthetase JAR2                  | 1.306718684                    | 1.501367974  | 1.648489596  |
| SAUR    | SORBI_3010G027700 | auxin-responsive protein SAUR50-like                 | -3.543858876                   | -2.047168021 | -1.788338123 |
|         | SORBI_3004G156300 | SAUR family protein                                  | -3.756682887                   | -5.641549997 | -5.462083002 |
|         | SORBI_3010G252500 | auxin-induced protein 6B                             | 2.113892573                    | 1.97972386   | 4.255872578  |
|         | SORBI_3004G302200 | SAUR family protein                                  | -3.99802406                    | -3.898316724 | -2.04996782  |
|         | SORBI_3006G252466 | indole-3-acetic acid-induced protein ARG7            | -3.061306896                   | -2.096205086 | -1.470979    |
| PYR/PYL | SORBI_3004G113800 | abscisic acid receptor PYL8                          | 1.572315235                    | 1.30362038   | 1.135176639  |
|         | SORBI_3001G403300 | abscisic acid receptor PYL4                          | -1.76808841                    | -1.942006437 | -1.468673074 |
| PP2C    | SORBI_3009G213000 | probable protein phosphatase 2C 50                   | 1.956911628                    | 1.990065372  | 1.206510433  |
|         | SORBI_3006G018400 | probable protein phosphatase 2C 37                   | 4.177362155                    | 4.161886732  | 4.381808801  |
| SNRK2   | SORBI_3001G294400 | serine/threonine-protein kinase SAPK3                | 1.622914902                    | 2.113384344  | 1.780231248  |
| ABF     | SORBI_3010G081800 | bZIP transcription factor 23                         | 1.216711367                    | 2.258064675  | 1.18790428   |
| ETR     | SORBI_3004G349175 | ethylene receptor 3                                  | 1.276866772                    | 1.374318552  | 1.791287168  |
| EBF1/2  | SORBI_3010G186200 | EIN3-binding F-box protein 1                         | 1.804282625                    | 1.257362928  | 1.070673081  |
| ERF1/2  | SORBI_3001G002500 | ethylene-responsive transcription factor 1B          | 4.099297818                    | 3.375950755  | 5.07620533   |

**Table S7.** DEGs involved in the plant hormone biosynthesis and the plant hormone signal transduction in roots.

| KEGG    | GENE ID           | Description                                          | log2(fold change) |              |              |
|---------|-------------------|------------------------------------------------------|-------------------|--------------|--------------|
|         |                   |                                                      | T6r vs CKr        | T12r vs CKr  | T24r vs CKr  |
| AUX1    | SORBI_3001G439000 | auxin transporter-like protein 2                     | -2.046680977      | -2.333959431 | -2.264297362 |
|         | SORBI_3005G052500 | auxin transporter-like protein 3                     | -1.930960004      | -3.220158278 | -3.758347917 |
|         | SORBI_3001G267100 | auxin transporter-like protein 3                     | -3.033597664      | -2.224931677 | -2.585844143 |
| AUX/IAA | SORBI_3003G291200 | auxin-responsive protein IAA6-like                   | 2.67244505        | 3.088837986  | 2.635677805  |
|         | SORBI_3009G069700 | auxin-responsive protein IAA16                       | -3.448069993      | -1.022414384 | -1.251701673 |
|         | SORBI_3001G161500 | auxin-responsive protein IAA12                       | -1.207066302      | -2.480032918 | -1.859806304 |
|         | SORBI_3010G180600 | auxin-responsive protein IAA23                       | -2.333237399      | -2.518437115 | -1.3139511   |
| ARF     | SORBI_3006G255300 | auxin response factor 3-like                         | -2.613057911      | -2.406772163 | -3.995893509 |
| GH3     | SORBI_3008G015100 | probable indole-3-acetic acid-amido synthetase GH3.8 | 2.233698069       | 2.494488603  | 3.779695053  |
|         | SORBI_3003G306500 | probable indole-3-acetic acid-amido synthetase GH3.2 | 2.395054601       | 3.8995514    | 6.757989764  |
|         | SORBI_3003G015000 | jasmonic acid-amido synthetase JAR2                  | 2.007602313       | 2.023791198  | 2.148718899  |
|         | SORBI_3009G187700 | probable indole-3-acetic acid-amido synthetase GH3.4 | -2.810719992      | -2.878627439 | -2.298571854 |
| SAUR    | SORBI_3010G252500 | auxin-induced protein 6B                             | 2.038103676       | 2.519959086  | 3.780109674  |
|         | SORBI_3006G216400 | auxin-responsive protein SAUR71                      | 2.650882554       | 2.346329686  | 2.743188107  |
|         | SORBI_3002G213600 | SAUR family protein                                  | 2.065083887       | 1.022819077  | 1.15546743   |
| PP2C    | SORBI_3009G213000 | probable protein phosphatase 2C 50                   | 1.58230168        | 1.358931987  | 3.117165003  |
|         | SORBI_3009G238600 | probable protein phosphatase 2C 51                   | 2.147395906       | 2.669900207  | 2.745827534  |
| SNRK2   | SORBI_3003G370100 | serine/threonine-protein kinase SAPK4                | 1.255908861       | 1.247231066  | 1.941659935  |
|         | SORBI_3006G083000 | serine/threonine-protein kinase SAPK7                | -1.391020809      | -1.176003888 | -1.619472781 |
|         | SORBI_3001G350700 | serine/threonine-protein kinase SAPK1                | 1.525242263       | 1.601703166  | 2.088073557  |
| ABF     | SORBI_3002G225100 | bZIP transcription factor TRAB1                      | 1.265075511       | 1.296856225  | 3.303029477  |
| ETR     | SORBI_3009G050400 | probable ethylene response sensor 2                  | 1.366117113       | 1.862481233  | 1.703423301  |
| CTR1    | SORBI_3002G133400 | serine/threonine-protein kinase CTR1                 | 1.120957075       | 1.04275212   | 2.387459164  |
| EIN3    | SORBI_3004G189100 | putative ETHYLENE INSENSITIVE 3-like 4 protein       | 1.303950753       | 1.605420615  | 2.636172318  |

**Table S8.** DEGs in ion transport pathways in shoots cells.

| <b>GENE ID</b>    | <b>Description</b>                                              |
|-------------------|-----------------------------------------------------------------|
| SORBI_3006G213500 | probable potassium transporter 11 isoform X1 [Sorghum bicolor]  |
| SORBI_3010G112800 | potassium transporter 24 [Sorghum bicolor]                      |
| SORBI_3010G197500 | potassium transporter 10 isoform X1 [Sorghum bicolor]           |
| SORBI_3001G132800 | calcium-dependent protein kinase 9 [Sorghum bicolor]            |
| SORBI_3004G025000 | calcium-dependent protein kinase 4 isoform X2 [Sorghum bicolor] |
| SORBI_3005G024200 | CBL-interacting protein kinase 32 [Sorghum bicolor]             |
| SORBI_3009G034200 | CBL-interacting protein kinase 17 [Sorghum bicolor]             |
| SORBI_3009G097300 | CBL-interacting protein kinase 22 [Sorghum bicolor]             |
| SORBI_3009G195800 | CBL-interacting protein kinase 19 [Sorghum bicolor]             |
| SORBI_3003G139500 | CBL-interacting protein kinase 1 [Sorghum bicolor]              |
| SORBI_3006G105600 | ABC transporter B family member 19 [Sorghum bicolor]            |
| SORBI_3007G164000 | ABC transporter F family member 1 [Sorghum bicolor]             |
| SORBI_3009G022000 | ABC transporter G family member 16 [Sorghum bicolor]            |
| SORBI_3009G058100 | ABC transporter F family member 4 [Sorghum bicolor]             |
| SORBI_3001G499100 | ABC transporter G family member 22 isoform X1 [Sorghum bicolor] |
| SORBI_3003G267300 | ABC transporter B family member 11 [Sorghum bicolor]            |
| SORBI_3002G162400 | two pore potassium channel c [Sorghum bicolor]                  |
| SORBI_3004G013300 | glutamate receptor 3.1 [Sorghum bicolor]                        |
| SORBI_3001G195800 | aquaporin NIP3-1 [Sorghum bicolor]                              |
| SORBI_3001G208500 | aquaporin TIP3-1 [Sorghum bicolor]                              |
| SORBI_3003G237900 | potassium channel AKT1 isoform X1 [Sorghum bicolor]             |

**Table S9.** DEGs in ion transport pathways in roots cells.

| <b>GENE ID</b>    | <b>Description</b>                                                             |
|-------------------|--------------------------------------------------------------------------------|
| SORBI_3001G183700 | potassium transporter 21 [Sorghum bicolor]                                     |
| SORBI_3001G184100 | probable potassium transporter 16 isoform X1 [Sorghum bicolor]                 |
| SORBI_3002G130800 | potassium transporter 18 isoform X1 [Sorghum bicolor]                          |
| SORBI_3002G417500 | probable potassium transporter 9 [Sorghum bicolor]                             |
| SORBI_3007G075100 | putative potassium transporter 12 isoform X1 [Sorghum bicolor]                 |
| SORBI_3010G112800 | potassium transporter 24 [Sorghum bicolor]                                     |
| SORBI_3010G197500 | potassium transporter 10 isoform X1 [Sorghum bicolor]                          |
| SORBI_3004G279100 | calcium-dependent protein kinase 5 [Sorghum bicolor]                           |
| SORBI_3003G196400 | calcineurin B-like protein 9 [Sorghum bicolor]                                 |
| SORBI_3003G208400 | calcineurin B-like protein 5 isoform X2 [Sorghum bicolor]                      |
| SORBI_3007G140900 | CBL-interacting protein kinase 6 [Sorghum bicolor]                             |
| SORBI_3008G032000 | CBL-interacting protein kinase 15 [Sorghum bicolor]                            |
| SORBI_3009G034200 | CBL-interacting protein kinase 17 [Sorghum bicolor]                            |
| SORBI_3010G186300 | CBL-interacting protein kinase 24 [Sorghum bicolor]                            |
| SORBI_3001G379600 | CBL-interacting protein kinase 10 [Sorghum bicolor]                            |
| SORBI_3001G390200 | CBL-interacting protein kinase 31 isoform X1 [Sorghum bicolor]                 |
| SORBI_3002G424500 | CBL-interacting protein kinase 31 [Sorghum bicolor]                            |
| SORBI_3003G024600 | putative CBL-interacting protein kinase 13 [Sorghum bicolor]                   |
| SORBI_3003G302800 | CBL-interacting protein kinase 19 [Sorghum bicolor]                            |
| SORBI_3001G383300 | ABC transporter B family member 25, mitochondrial [Sorghum bicolor]            |
| SORBI_3002G054300 | ABC transporter F family member 4 [Sorghum bicolor]                            |
| SORBI_3003G177350 | putative ABC transporter C family member 15 isoform X1 [Sorghum bicolor]       |
| SORBI_3003G180400 | ABC transporter B family member 11 [Sorghum bicolor]                           |
| SORBI_3003G215600 | ABC transporter G family member 35 [Sorghum bicolor]                           |
| SORBI_3003G267300 | ABC transporter B family member 11 [Sorghum bicolor]                           |
| SORBI_3003G267700 | ABC transporter B family member 4 [Sorghum bicolor]                            |
| SORBI_3003G387300 | ABC transporter G family member 5 [Sorghum bicolor]                            |
| SORBI_3003G398100 | ABC transporter B family member 26, chloroplastic-like [Sorghum bicolor]       |
| SORBI_3004G087800 | ABC transporter G family member 39 [Sorghum bicolor]                           |
| SORBI_3004G128100 | ABC transporter E family member 2 isoform X1 [Sorghum bicolor]                 |
| SORBI_3005G061000 | ABC transporter G family member 25 [Sorghum bicolor]                           |
| SORBI_3006G022200 | ABC transporter C family member 4 [Sorghum bicolor]                            |
| SORBI_3006G114100 | ABC transporter G family member 51 [Sorghum bicolor]                           |
| SORBI_3006G195800 | putative ABC transporter C family member 15 [Sorghum bicolor]                  |
| SORBI_3007G120000 | ABC transporter A family member 7 [Sorghum bicolor]                            |
| SORBI_3007G164000 | ABC transporter F family member 1 [Sorghum bicolor]                            |
| SORBI_3010G169000 | ABC transporter C family member 8 [Sorghum bicolor]                            |
| SORBI_3008G109300 | 2'-deoxymugineic-acid 2'-dioxygenase-like [Sorghum bicolor]                    |
| SORBI_3004G299600 | iron-phytosiderophore transporter yellow stripe 1 isoform X1 [Sorghum bicolor] |
| SORBI_3002G162400 | two pore potassium channel c [Sorghum bicolor]                                 |

|                   |                                                     |
|-------------------|-----------------------------------------------------|
| SORBI_3002G209100 | glutamate receptor 2.8 isoform X2 [Sorghum bicolor] |
| SORBI_3004G324000 | glutamate receptor 2.8 [Sorghum bicolor]            |
| SORBI_3010G092600 | aquaporin NIP2-2 [Sorghum bicolor]                  |
| SORBI_3010G146100 | probable aquaporin TIP2-2 [Sorghum bicolor]         |
| SORBI_3003G300600 | potassium channel KAT3 isoform X1 [Sorghum bicolor] |
| SORBI_3003G237900 | potassium channel AKT1 isoform X1 [Sorghum bicolor] |
| SORBI_3001G240300 | cation/calcium exchanger 1 [Sorghum bicolor]        |
| SORBI_3009G069800 | hexokinase-7 [Sorghum bicolor]                      |

---

**Table S10.** Primers used in experiment of gene expression by qPCR.

| <b>GENE ID</b>    | <b>Forward Primer</b>     | <b>Reverse Primer</b>     |
|-------------------|---------------------------|---------------------------|
| Actin 1           | TCTTCCAACCCTACCGCACCA     | CGTCATCTCCAGCGAACCCAGCCTT |
| SORBI_3004G082600 | CCCGAGGAAAATGATCGCCT      | AGGCAGTCCACCCAGTAGAA      |
| SORBI_3008G011200 | CATCAAGGCCGACATCTGGT      | CTTGAACGCCCTGGAGAACT      |
| SORBI_3001G218800 | CACATTGCTCAAGTGCTGGG      | AGTCCAAACTGACGACCACC      |
| SORBI_3001G350400 | CCCTCAGCCTTGTGCCAATA      | TGCCCATCCGCTGAAATCTT      |
| SORBI_3009G156000 | ACTCAACCAGCGATGAGGAC      | TTCTAGCGCAGTGAGGTGTC      |
| SORBI_3002G256500 | TGGAGTGCAGGCTTTCAGAG      | CTGGCGAGTTCGTTTCCTTCT     |
| SORBI_3004G327600 | AGAAGCAGAGGCTGATCGAC      | TTGGATCACCTCGTTGAGGC      |
| SORBI_3002G027700 | TTCACGGAGGAGGGATAGCA      | GGGAGCCATTCTCCAACACA      |
| SORBI_3009G189501 | AAGCAATCCGTCTCGTCGTT      | AGGTAGCCGAAGACAAGTGC      |
| SORBI_3009G069800 | CCTCCCAATCCAAGGTGGTC      | CCTCCCAATCCAAGGTGGTC      |
| SORBI_3002G162400 | CCCATCCCCAGCCGCCTC        | CGGCGGAGGAAGGGTCCT        |
| SORBI_3007G164000 | GAGGTTCCCCTTCTTCCCCC      | GAGGTTCCCCTTCTTCCCCC      |
| SORBI_3010G169000 | GTCCCCGTGCGTGCAGAG        | CTCACCGGCCACGAGATCG       |
| SORBI_3002G054300 | CAAGTCGTCCAAGTCGGCG       | CGTCGTCGCCGGTGACGC        |
| SORBI_3008G032000 | TTGTTTCATCTTCATGAGGTCATGG | TTGTTTCATCTTCATGAGGTCATGG |
| SORBI_3001G379600 | TTGTTTCATCTTCATGAGGTCATGG | AAAATCCGACACCTTGAGGTTCT   |
| SORBI_3003G196400 | GATGCTGATGCCGATAAGGATG    | TGACAGCCAACAGTCATCAAGG    |
| SORBI_3002G141900 | CATTCCCTCCAGACTCGGACT     | CCAGCGAAGTGGGAAGCG        |
| SORBI_3004G293500 | TGATTCCGCTAGAGGACTCAAGC   | TGATTCCGCTAGAGGACTCAAGC   |
| SORBI_3010G035300 | AGAGGACTACCGATCTCTTCAATTG | AGCAGCACTATTCTTGTCTTCCTTC |
| SORBI_3006G014700 | CGACTGCGACCACTGCCG        | TACACGGTGATCCCCGCG        |

**Table S11.** DEGs of Transcriptome network.

| KEGG                               | GENE ID           | Description                                         | log2(fold change) |              |              |
|------------------------------------|-------------------|-----------------------------------------------------|-------------------|--------------|--------------|
|                                    |                   |                                                     | T6s vs CKs        | T12s vs CKs  | T24s vs CKs  |
| Cinnamic acid→Cinnanayol-CoA       | SORBI_3004G272700 | probable 4-coumarate--CoA ligase 2                  | -2.988051392      | -2.419823005 | -0.402261017 |
| Cinnamoyl CoA→Cinnamaldehyde       | SORBI_3002G146000 | cinnamoyl-CoA reductase 2                           | -0.516027994      | -0.57162158  | 0.260162014  |
|                                    | SORBI_3004G065600 | cinnamoyl-CoA reductase 1                           | -3.519446148      | -3.150263622 | -2.428909365 |
| P-Coumaroyl acid→P-Coumaroyl-CoA   | SORBI_3004G272700 | probable 4-coumarate--CoA ligase 2                  | -2.988051392      | -2.419823005 | -0.402261017 |
| ANP1                               | SORBI_3007G130000 | mitogen-activated protein kinase kinase kinase NPK1 | -6.510532291      | -3.339352381 | -4.414078787 |
| NDPK2                              | SORBI_3008G123600 | nucleoside diphosphate kinase 2, chloroplastic      | -2.028129006      | -2.188312417 | -2.807083858 |
| OXI1                               | SORBI_3006G128200 | serine/threonine-protein kinase OXI1                | -2.88290153       | -2.237042328 | -1.278181242 |
| Surose→UDP-Glucose                 | SORBI_3001G344500 | sucrose synthase 2                                  | -3.166143728      | -3.884623365 | -2.102079233 |
| UDP-glucose→Trehalose-6P           | SORBI_3002G188500 | probable alpha,alpha-trehalose-phosphate synthase   | 1.673805401       | 1.142422369  | 1.513387058  |
|                                    | SORBI_3009G200200 | alpha,alpha-trehalose-phosphate synthase            | -1.074356859      | -1.81361535  | -1.216001835 |
| Trehalose-6P→Trehalose             | SORBI_3004G293500 | probable trehalose-phosphate phosphatase 1          | -1.556138042      | -1.414304471 | -1.069870664 |
|                                    | SORBI_3002G184600 | probable trehalose-phosphate phosphatase 6          | -2.390498038      | -2.873371589 | -3.242254973 |
|                                    | SORBI_3009G200200 | alpha,alpha-trehalose-phosphate synthase            | -1.074356859      | -1.81361535  | -1.216001835 |
| Surose-6P→D-Glucose-6P or D-Frucro | SORBI_3006G070564 | beta-fructofuranosidase, insoluble isoenzyme 2      | -2.56613151       | -4.000084786 | -1.699926855 |

**Table S12.** DEGs of Transcriptome network.

| KEGG                              | GENE ID           | Description                                              | log2(fold change) |              |              |
|-----------------------------------|-------------------|----------------------------------------------------------|-------------------|--------------|--------------|
|                                   |                   |                                                          | T6r vs CKr        | T12r vs CKr  | T24r vs CKr  |
| 5-Oxoproline→L-Glutamate          | SORBI_3001G322700 | 5-oxoprolinase [Sorghum bicolor]                         | 1.451953689       | 1.375913599  | 1.176517464  |
| Glycine                           | SORBI_3008G113600 | glutathione synthetase, chloroplastic [Sorghum bicolor]  | 1.083640389       | 1.22965188   | 1.286041425  |
| GSH→R-S-Glutathione               | SORBI_3003G426000 | probable glutathione S-transferase                       | 2.253872443       | 2.080755511  | 2.127926438  |
|                                   | SORBI_3001G318600 | probable glutathione S-transferase                       | 2.157630746       | 2.022143431  | 5.084708355  |
|                                   | SORBI_3003G426300 | probable glutathione S-transferase GSTU6                 | 1.218335884       | 1.538804228  | 3.91036757   |
|                                   | SORBI_3008G079400 | probable glutathione S-transferase GSTU6                 | 2.770048375       | 2.412963259  | 2.316992289  |
|                                   | SORBI_3001G318800 | probable glutathione S-transferase GSTU6                 | 6.255574596       | 7.740129198  | 9.952179034  |
|                                   | SORBI_3005G212700 | probable glutathione S-transferase GSTU6                 | 1.71175633        | 1.759414451  | 4.648790291  |
|                                   | SORBI_3001G249500 | uncharacterized LOC8063175                               | -7.044032733      | -7.116561579 | -4.45452126  |
|                                   | SORBI_3001G249600 | probable glutathione S-transferase BZ2                   | -9.953702694      | -10.02351634 | -3.467308224 |
|                                   | SORBI_3001G066000 | probable glutathione S-transferase BZ2                   | 1.061700806       | 1.676326685  | 2.278030729  |
|                                   | SORBI_3009G043600 | probable glutathione S-transferase GSTU6                 | 1.183676917       | 1.223376578  | 1.665438797  |
|                                   | SORBI_3003G264400 | glutathione S-transferase 4                              | 2.596457099       | 3.012603911  | 4.012757183  |
|                                   | SORBI_3001G412700 | probable glutathione S-transferase GSTU6                 | 2.369450554       | 2.499811137  | 3.542798148  |
|                                   | SORBI_3001G319200 | probable glutathione S-transferase GSTU1                 | 1.844905354       | 1.83513546   | 3.617796681  |
|                                   | SORBI_3001G318500 | probable glutathione S-transferase GSTF1                 | 1.636064678       | 2.037455764  | 3.258552593  |
|                                   | SORBI_3001G318000 | protein IN2-1                                            | 2.597441606       | 3.096916998  | 5.4884229    |
| Uracil→5,6-Dihydrouracil          | SORBI_3002G215700 | dihydropyrimidine dehydrogenase (NADP(+)), chloroplastic | 1.65541644        | 2.137363852  | 1.882294206  |
| N-Carbamoyl-β-alanine→β-Alanine   | SORBI_3002G304000 | beta-ureidopropionase                                    | 1.704934315       | 2.184078408  | 1.782591368  |
| β-Alanine→β-Aminopropion-aldehyde | SORBI_3002G215700 | aldehyde dehydrogenase family 7 member A1                | 1.813283572       | 2.115547106  | 3.524351038  |

|                                              |                   |                                             |              |              |              |
|----------------------------------------------|-------------------|---------------------------------------------|--------------|--------------|--------------|
| 1,3-Diamino-propane→β-Aminopropion-aldehyde  | SORBI_3004G243400 | primary amine oxidase 2                     | -2.385576936 | -3.770480815 | -1.490069485 |
|                                              | SORBI_3006G119200 | copper methylamine oxidase                  | 1.40825822   | 1.539272196  | 2.041118342  |
| Spermidine→1,3-Diamino-propane               | SORBI_3001G472000 | polyamine oxidase-like                      | -2.807676514 | -3.001832564 | -2.879676896 |
|                                              | SORBI_3007G073100 | polyamine oxidase                           | -1.891005584 | -1.73193786  | -3.280690611 |
| Spermine→Spermidine                          | SORBI_3001G472000 | polyamine oxidase-like                      | -1.891005584 | -1.73193786  | -3.280690611 |
|                                              | SORBI_3003G274600 | probable polyamine oxidase 5                | -5.842467796 | -5.007035576 | -3.648216997 |
|                                              | SORBI_3007G073100 | polyamine oxidase                           | -1.891005584 | -1.73193786  | -3.280690611 |
| β-Alanine→(R)-Pantothenate                   | SORBI_3001G009900 | pantoate--beta-alanine ligase               | 1.425573766  | 2.122244643  | 3.377037481  |
| 3-Hydroxyisobutyryl-CoA→3-Hydroxy-propanoate | SORBI_3001G290000 | 3-hydroxyisobutyryl-CoA hydrolase 1         | 1.217072962  | 1.554401963  | 1.290075445  |
| Acrylyl-CoA→3-Hydroxyisobutyryl-CoA          | SORBI_3001G393800 | probable enoyl-CoA hydratase 1, peroxisomal | 1.217072962  | 1.554401963  | 1.290075445  |
| Propionyl-CoA→Acrylyl-CoA                    | SORBI_3005G181000 | acyl-coenzyme A oxidase 2, peroxisomal      | 3.583695886  | 3.894417883  | 4.490409233  |
|                                              | SORBI_3003G354400 | acyl-coenzyme A oxidase 3, peroxisomal      | 2.183446723  | 2.076473821  | 3.850312006  |
|                                              | SORBI_3006G012800 | acyl-coenzyme A oxidase 4, peroxisomal      | 3.074777427  | 2.945550391  | 8.656628975  |

---

**Table S13.** Transcription factor in shoots and roots.

| KEGG | GENE ID           | Description                                                       | log2(fold change) |              |              |
|------|-------------------|-------------------------------------------------------------------|-------------------|--------------|--------------|
|      |                   |                                                                   | T6s vs CKs        | T12s vs CKs  | T24s vs CKs  |
| WRKY | SORBI_3001G055400 | protein WRKY1 [Sorghum bicolor]                                   | 3.328562468       | 2.313466207  | 3.35726579   |
|      | SORBI_3004G271800 | probable WRKY transcription factor 14 [Sorghum bicolor]           | 1.622596545       | 3.076794482  | 3.567027919  |
|      | SORBI_3007G077466 | hypothetical protein SORBI_3007G077466 [Sorghum bicolor]          | 1.733194392       | 1.509590007  | 1.185091705  |
|      | SORBI_3008G028600 | probable WRKY transcription factor 54 [Sorghum bicolor]           | -3.72639145       | -2.038496559 | -2.231018358 |
|      | SORBI_3009G206800 | probable WRKY transcription factor 56 [Sorghum bicolor]           | -1.664541798      | -1.222153951 | -1.090451025 |
|      | SORBI_3001G084000 | probable WRKY transcription factor 48 [Sorghum bicolor]           | -3.138586528      | -3.136701072 | -2.475873442 |
| MYB  | SORBI_3007G177100 | myb-related protein Zm38 [Sorghum bicolor]                        | 2.287632906       | 3.101192878  | 2.773944624  |
|      | SORBI_3009G148100 | myb-related protein 308 [Sorghum bicolor]                         | -2.116815746      | -2.36609787  | -1.370632085 |
|      | SORBI_3003G129000 | transcription factor MYB117 [Sorghum bicolor]                     | 1.147541014       | 1.000717694  | 2.611621737  |
|      | SORBI_3007G136500 | hypothetical protein BDA96_07G146300 [Sorghum bicolor]            | -2.857716476      | -1.426434056 | -1.720287052 |
|      | SORBI_3001G356000 | myb-related protein 306-like [Sorghum bicolor]                    | 1.427259516       | 1.161469739  | 2.840086043  |
|      | SORBI_3002G196000 | protein ODORANT1 [Sorghum bicolor]                                | 2.117629665       | 2.358857365  | 3.748659533  |
| NAC  | SORBI_3003G034500 | transcription factor RAX2 [Sorghum bicolor]                       | 2.889582391       | 1.812154491  | 2.803142197  |
|      | SORBI_3006G218300 | hypothetical protein BDA96_06G238900 [Sorghum bicolor]            | 1.964672356       | 1.361738288  | 3.688400221  |
|      | SORBI_3006G279400 | NAC domain-containing protein 30 [Sorghum bicolor]                | 1.08751927        | 1.38188795   | 1.52455875   |
|      | SORBI_3003G365500 | NAC domain-containing protein 90 [Sorghum bicolor]                | -4.140673498      | -4.145408576 | -3.069381313 |
| bHLH | SORBI_3006G086000 | NAC domain-containing protein 104-like [Sorghum bicolor]          | 1.626852439       | 1.652336017  | 1.933082985  |
|      | SORBI_3010G172800 | putative transcription factor bHLH041 [Sorghum bicolor]           | 1.453547007       | 1.415858355  | 2.065175147  |
|      | SORBI_3003G102300 | transcription factor bHLH162 [Sorghum bicolor]                    | 1.218063037       | 3.444112185  | 1.966110422  |
| AP2  | SORBI_3005G195400 | transcription factor bHLH54 [Sorghum bicolor]                     | 2.330231602       | 1.702927363  | 3.407893629  |
|      | SORBI_3001G296300 | ethylene-responsive transcription factor ERF104 [Sorghum bicolor] | 1.849000775       | 1.454289197  | 2.141041251  |

|                   |                                                                         |             |              |             |
|-------------------|-------------------------------------------------------------------------|-------------|--------------|-------------|
| SORBI_3002G350500 | ethylene-responsive transcription factor RAP2-11-like [Sorghum bicolor] | 1.458851119 | 1.481810437  | 1.859456749 |
| SORBI_3007G188701 | hypothetical protein SORBI_3007G188701 [Sorghum bicolor]                | 3.026476432 | 2.102783555  | 3.822434959 |
| SORBI_3002G139300 | ethylene-responsive transcription factor ERF096-like [Sorghum bicolor]  | 1.454668857 | -1.141524515 | 1.68029745  |
| SORBI_3006G247000 | ethylene-responsive transcription factor ERF003 [Sorghum bicolor]       | 2.625835684 | 1.597872507  | 2.208843803 |
| SORBI_3001G473900 | ethylene-responsive transcription factor RAP2-13 [Sorghum bicolor]      | 2.428551312 | 2.398248676  | 2.402268096 |

**Table S14.** Transcription factor in shoots and roots.

| KEGG | GENE ID           | Description                                                        | log2(fold change) |              |              |
|------|-------------------|--------------------------------------------------------------------|-------------------|--------------|--------------|
|      |                   |                                                                    | T6r vs CKr        | T12r vs CKr  | T24r vs CKr  |
| WRKY | SORBI_3007G217700 | hypothetical protein SORBI_3007G217700 [Sorghum bicolor]           | 2.266140861       | 2.185623005  | 3.108475542  |
|      | SORBI_3008G107500 | probable WRKY transcription factor 3 [Sorghum bicolor]             | 2.032184372       | 2.006505208  | 2.648253588  |
|      | SORBI_3010G035300 | probable WRKY transcription factor 61 [Sorghum bicolor]            | 2.567117809       | 1.356330663  | 3.80972875   |
|      | SORBI_3009G206800 | probable WRKY transcription factor 56 [Sorghum bicolor]            | -2.206461417      | -2.338343017 | -3.226503623 |
|      | SORBI_3003G037400 | probable WRKY transcription factor 50 isoform X1 [Sorghum bicolor] | 1.153684217       | 1.105082011  | 1.265865909  |
|      | SORBI_3007G085300 | hypothetical protein SORBI_3007G085300 [Sorghum bicolor]           | -2.112845265      | -1.387043297 | 1.213117559  |
| MYB  | SORBI_3004G303600 | transcription factor LAF1 [Sorghum bicolor]                        | -2.202870472      | -2.137415588 | -2.517373482 |
|      | SORBI_3004G219800 | transcription factor MYB4 [Sorghum bicolor]                        | -3.213410646      | -1.624782799 | 1.618492935  |
|      | SORBI_3008G020300 | transcription factor MYB30 [Sorghum bicolor]                       | -1.986271844      | -1.706099154 | -1.980038786 |
|      | SORBI_3003G280000 | transcription factor MYB58 [Sorghum bicolor]                       | 2.800162377       | 1.948801559  | 2.585314231  |
|      | SORBI_3003G034500 | transcription factor RAX2 [Sorghum bicolor]                        | 2.972557717       | 2.994184111  | 1.717982717  |
|      | SORBI_3007G177100 | myb-related protein Zm38 [Sorghum bicolor]                         | 1.73418671        | 2.256013859  | 3.43505087   |
| NAC  | SORBI_3001G071000 | transcription factor JUNGBRUNNEN 1 [Sorghum bicolor]               | 1.927387063       | 2.075666941  | 3.48987267   |
|      | SORBI_3008G183900 | transcription factor JUNGBRUNNEN 1 [Sorghum bicolor]               | 1.775617771       | 1.140943648  | 3.752331002  |

|      |                   |                                                                        |              |              |              |
|------|-------------------|------------------------------------------------------------------------|--------------|--------------|--------------|
|      | SORBI_3008G057700 | hypothetical protein SORBI_3008G057700 [Sorghum bicolor]               | -2.293067452 | -1.659412722 | -2.99241448  |
|      | SORBI_3001G515800 | NAC domain-containing protein 35 [Sorghum bicolor]                     | -3.214579597 | -2.387157037 | 1.666105009  |
|      | SORBI_3006G147400 | hypothetical protein SORBI_3006G147400 [Sorghum bicolor]               | -1.82451557  | -3.326452965 | -3.829407495 |
|      | SORBI_3006G086000 | NAC domain-containing protein 104-like [Sorghum bicolor]               | 2.850394196  | 3.278813638  | 3.612789057  |
| bHLH | SORBI_3006G217800 | unnamed protein product [Miscanthus lutarioriparius]                   | 1.459236902  | 2.815169641  | 2.496218831  |
|      | SORBI_3001G447800 | transcription factor bHLH74 isoform X1 [Sorghum bicolor]               | -3.093254437 | -3.090634176 | -1.618804386 |
|      | SORBI_3009G036400 | hypothetical protein SORBI_3009G036400 [Sorghum bicolor]               | -1.555274006 | -2.258997282 | -2.396029572 |
|      | SORBI_3001G464300 | transcription factor bHLH84 [Sorghum bicolor]                          | 3.06253233   | 1.861981452  | 2.829980817  |
|      | SORBI_3003G099000 | transcription factor bHLH69 [Sorghum bicolor]                          | 1.731601684  | 2.280999635  | 2.503336412  |
| AP2  | SORBI_3010G052600 | ethylene-responsive transcription factor RAP2-1 [Sorghum bicolor]      | 1.772556615  | 1.542869521  | 1.460645334  |
|      | SORBI_3001G481300 | ethylene-responsive transcription factor 1 [Sorghum bicolor]           | 1.167559804  | 1.541073082  | 4.492174305  |
|      | SORBI_3007G188701 | hypothetical protein SORBI_3007G188701 [Sorghum bicolor]               | 1.635089665  | 2.046607713  | 2.551462487  |
|      | SORBI_3002G139300 | ethylene-responsive transcription factor ERF096-like [Sorghum bicolor] | -2.229557664 | -1.233760979 | 2.68425325   |

---
